# Supplementary material
Source: PubMed Central journal article supplement (PMC7370614)
Supplement: Supplemental_Material10.pdf [file Supplemental_Material10.pdf]

Supplemental Information

**Partial loss of endothelial nitric oxide leads to increased cerebrovascular beta amyloid**

Susan A. Austin, Ph.D. and Zvonimir S. Katusic, M.D., Ph.D.

Supplemental Table, Figures and Figure Legends

**Supplemental Table 1.** Peripheral parameters of 18 month old wild type and eNOS<sup>+/-</sup> mice.

Data is presented as mean ±SD (\*P<0.05).

**Supplemental Figure 1.** Expression of APP, BACE1, and ADAM10 were unaltered in brain tissue. (a) Brain tissue from 18 month old eNOS<sup>+/-</sup> and wild type animals was Western blotted using anti-APP, anti-BACE1, anti-ADAM10, and anti-Actin (loading control) antibodies.

Representative image is shown. Densitometric analysis was performed for (b) APP, (c) BACE1, and (d) ADAM10 (n=6-7 animals). BACE enzymatic activity was measured from 18 month old eNOS<sup>+/-</sup> and wild type (e) brain tissue via a commercially available BACE activity assay kit (n=3-4; \*P<0.05). All data are presented as mean ±SD with individual data points shown.

**Supplemental Figure 2.** Expression of eNOS was significantly decreased in microvascular tissue of eNOS<sup>+/-</sup> mice. (a) Microvascular tissue from 18 month old eNOS<sup>+/-</sup> and wild type animals was analyzed by Western blot analyses for NOS isoforms. Representative image is shown. Densitometric analysis was performed for (b) eNOS (n=3 animals; \*P<0.05) and (c) iNOS (n=8 animals). All data are presented as mean ±SD with individual data points shown.

**Supplemental Figure 3.** Expression of COX-2 was significantly higher in 18 month old eNOS<sup>+/-</sup> microvascular tissue. (a) Brain tissue from 18 month old eNOS<sup>+/-</sup> and wild type animals was Western blotted using anti-COX-1, anti-COX-2, anti-PGI<sub>2</sub>S, anti-TXA<sub>2</sub>S, and anti-Actin (loading control) antibodies. Representative image is shown. Densitometric analysis was performed for (b) COX-1 (n=7 animals), (c) COX-2 (n=5-6 animals; \*P<0.05), (d) PGI<sub>2</sub>S (n=6 animals), and (e) TXA<sub>2</sub>S (n=12 animals). All data are presented as mean ±SD with individual data points shown.

**Supplemental Figure 4.** Expression of eNOS was significantly decreased while other NOS isoforms were unchanged in brain tissue of eNOS<sup>+/-</sup> mice. (a) Brain tissue from 18 month old eNOS<sup>+/-</sup> and wild type animals was analyzed by Western blot analyses for NOS isoforms. Representative image is shown. Densitometric analysis was performed for (b) eNOS, (c) iNOS,

and (d) nNOS (n=7 animals; \*\*\*P<0.0001). All data are presented as mean  $\pm$ SD with individual data points shown.

**Supplemental Figure 5.** IDE was significantly increased in 18 month old eNOS<sup>+/-</sup> brain tissue.

(a) Brain tissue from 18 month old eNOS<sup>+/-</sup> and wild type animals was Western blotted using anti-ECE1, anti-IDE, anti-neprilysin, and anti-Actin (loading control) antibodies. Representative image is shown. Densitometric analysis was performed for (b) ECE1 (n=7 animals), (c) IDE (n=9 animals; \*P<0.05), and (d) neprilysin (n=5 animals). All data are presented as mean  $\pm$ SD with individual data points shown.

**Supplemental Figure 6.** Expression of A $\beta$  receptors, LRP1 and RAGE, were unaltered in brain

tissue of eNOS<sup>+/-</sup> mice. (a) Brain tissue from 18 month old eNOS<sup>+/-</sup> and wild type animals was analyzed by Western blot analyses for A $\beta$  receptors: LRP1 and RAGE. Representative image is shown. Densitometric analysis was performed for (b) LRP1 and (c) RAGE (n=7 animals). All data are presented as mean  $\pm$ SD with individual data points shown.

Supplemental Table 1. Characteristics of 18 month old wild type and eNOS<sup>+/-</sup> mice.

| Parameter                  | Wild type    | eNOS <sup>+/-</sup> |       |
|----------------------------|--------------|---------------------|-------|
| Body weight (g)            | 35.29±4.62   | 38.35±6.27          | N=18  |
| Cholesterol, Total (mg/dL) | 70.40±8.17   | 67.60±5.32          | N=5   |
| HDL (mg/dL)                | 51.80±8.70   | 50.20±4.87          | N=5   |
| Triglycerides (mg/dL)      | 78.40±14.29  | 99.75±11.87*        | N=4-5 |
| Glucose (mg/dL)            | 189.24±39.60 | 199.29±31.63        | N=17  |
| sAPP $\alpha$ (pg/mL)      | 523.88±65.53 | 575.07±50.97        | N=5   |
| A $\beta$ 40 (pg/mL)       | 220.70±68.79 | 216.91±23.85        | N=7   |
| A $\beta$ 42 (pg/mL)       | 8.72±3.72    | 14.06±5.54          | N=4-6 |

Data presented as mean  $\pm$  SD (\*p<0.05).

(a)

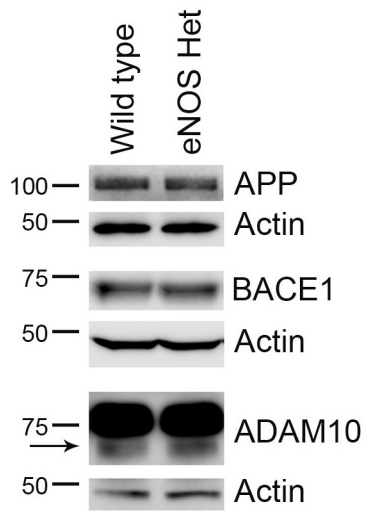

(b)

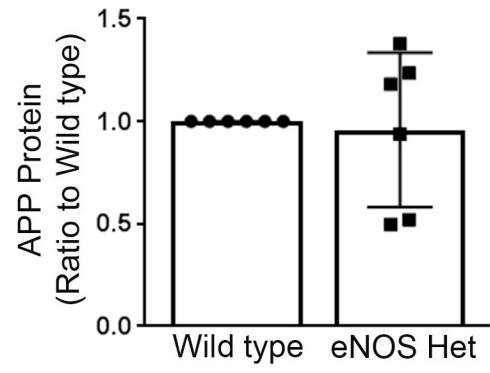

(c)

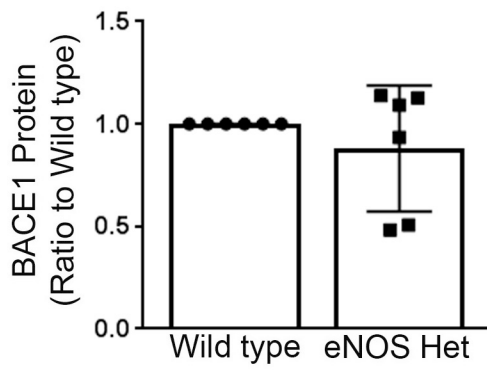

(d)

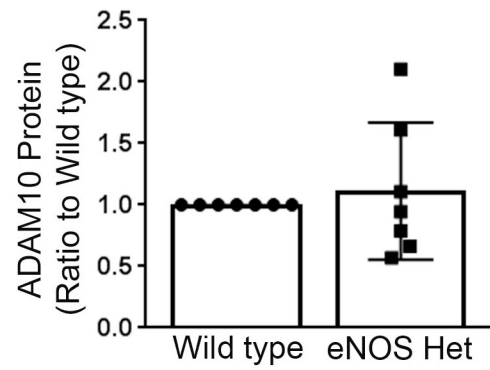

(e)

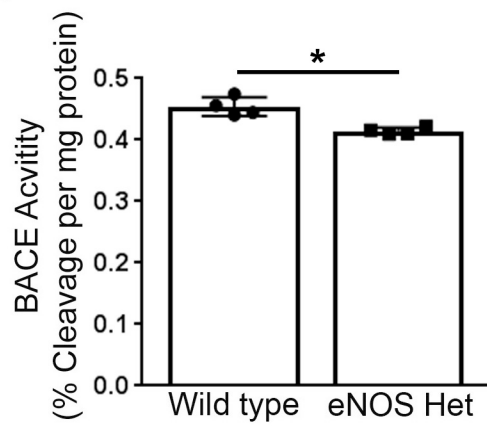

Supplemental Figure 1

(a)

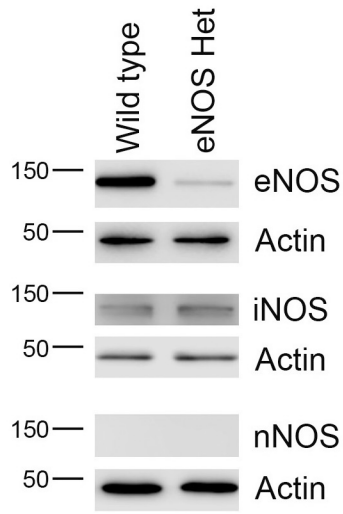

(b)

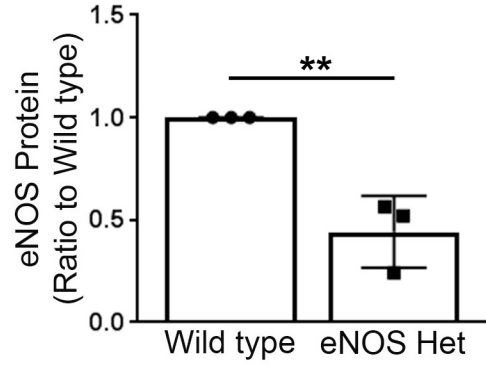

(c)

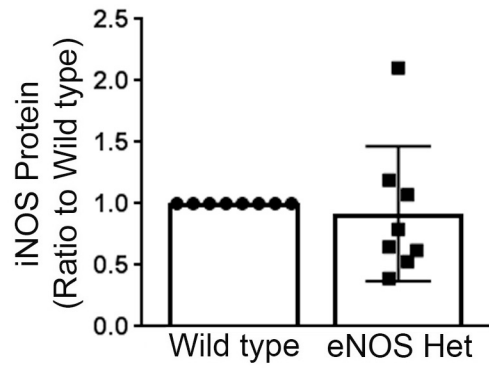

Supplemental Figure 2

(a)

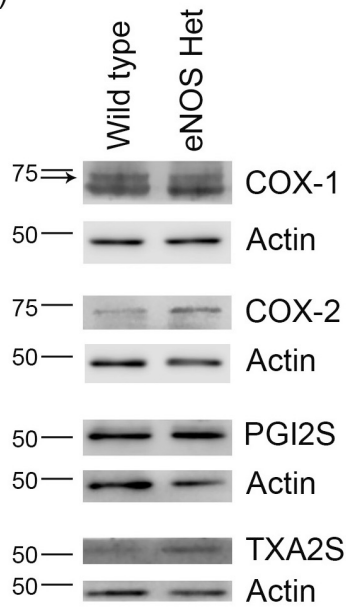

(b)

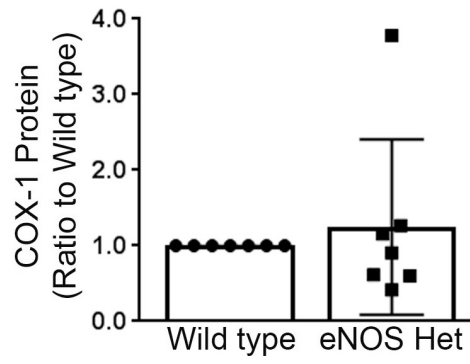

(c)

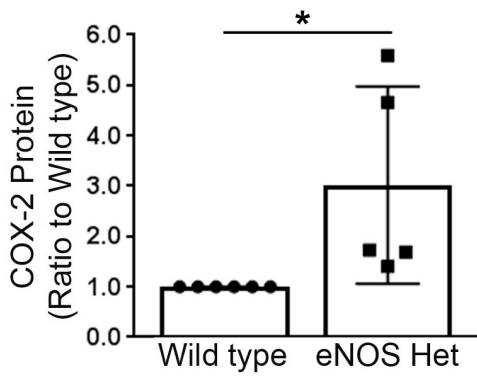

(d)

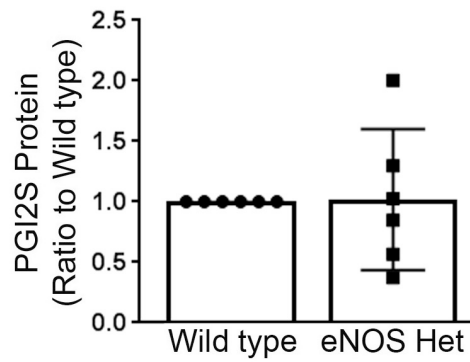

(e)

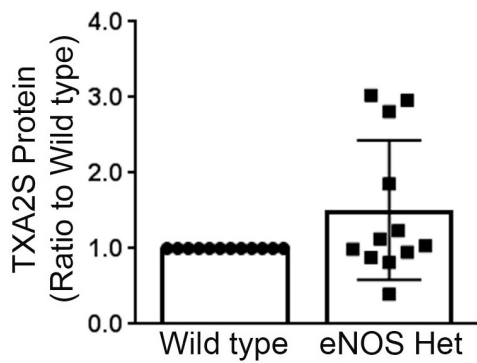

Supplemental Figure 3



(a)

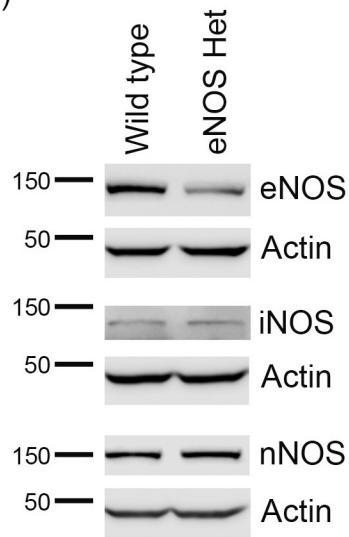

(b)

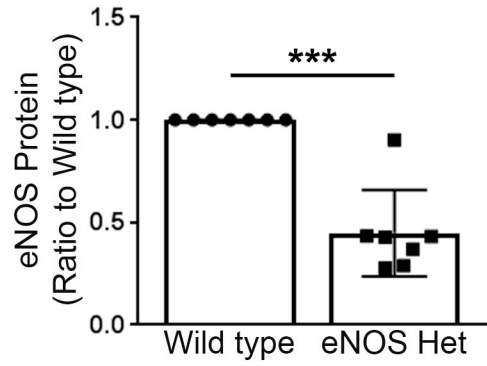

(c)

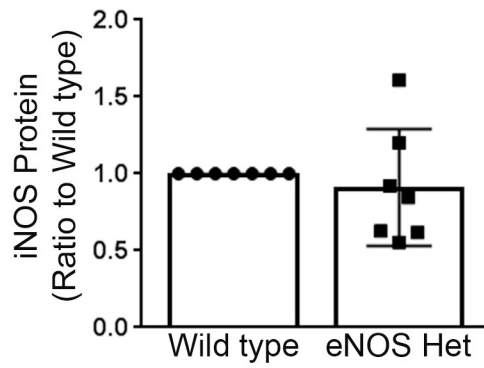

(d)

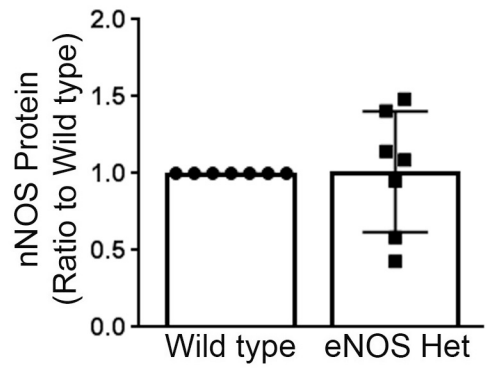

Supplemental Figure 4
